# Supplementary material for: Comparison of Protein Content, Availability, and Different Properties of Plant Protein Sources with Their Application in Packaging
Source: MDPI journal article supplement (doi:10.3390/polym14051065), 2022-03-07
Supplement: s1 [file s1]

# Comparison of Protein Content, Availability, and Different Properties of Plant Protein Sources with Their Application in Packaging

Anupriya Senthilkumaran <sup>1</sup>, Amin Babaei-Ghazvini <sup>1</sup>, Michael T. Nickerson <sup>2</sup>, Bishnu Acharya <sup>1,\*</sup>

<sup>1</sup> Department of Chemical and Biological Engineering, University of Saskatchewan, Saskatoon, SK S7N 5A9, Canada; jwy763@mail.usask.ca (A.S.); amin.babaei@usask.ca (A.B.-G.)

<sup>2</sup> Department of Food and Bioproduct Sciences, University of Saskatchewan, Saskatoon, SK S7N 5A8, Canada; mtn620@usask.ca

\* Correspondence: bishnu.acharya@usask.ca

**Table S1:** Protein sources with its type, method of formation and composition of bioplastics

| S.No | Source         | Type        | Method of formation         | Composition/parameters                                                                                                                                                                                                                                                               | References |
|------|----------------|-------------|-----------------------------|--------------------------------------------------------------------------------------------------------------------------------------------------------------------------------------------------------------------------------------------------------------------------------------|------------|
|      |                |             | Castin Extrusi Mold-<br>ing |                                                                                                                                                                                                                                                                                      |            |
| 1    | Sesame         | Edible film | ✓                           | Sesame Protein Isolate (SPI) from defatted sesame meal by alkali method.<br>SPI (3, 6, 9%) + distilled water +plasticizer [glycerol{GLY} (10, 30, 50%w/w on protein)], pH 9-12, heated at 70-90°C, dried at 60°C and 50% relative humidity(RH) for 8 h                               | [88]       |
| 2    | Mung bean      | Edible film | ✓                           | Protein from mung bean flour by alkaline extraction and acid precipitation.<br>Freeze-dried proteins+ distilled water(3g/100ml) + pH 8 -10+ plasticizer [ sorbitol 2:1]<br>Homogenized at 10,000rpm for 2minutes, heated at 60,70,80° C, cooled to ambient temp and stored at 60% RH | [82]       |
| 3    | Lentil protein | Edible film | ✓                           | Lentil protein concentrate (LPC) from lentil seeds<br>LPC(5g/100mlwater), plasticizer [GLY 50%(w/w) of LPC)], pH 11, heated at 70°C for 20mins, dried at 60°C for 7hr                                                                                                                | [83]       |
| 4a   | Pea            | Edible film | ✓                           | Denatured pea protein concentrate (PPC) from yellow field peas acquired as a liquid.<br>Aqueous solutions of 10% (w/w) PPC+ Plasticizer [GLY/ g PPC] at a ratio from 80/20 to 50/50 of PPC/Glycerol. Solution heat denatured at 90°C for 25mins and cooled to room temperature       | [66]       |

|    |             |   |                                                                                                                                                                                                                                                                                                                                                                                                                                             |       |
|----|-------------|---|---------------------------------------------------------------------------------------------------------------------------------------------------------------------------------------------------------------------------------------------------------------------------------------------------------------------------------------------------------------------------------------------------------------------------------------------|-------|
| b  | Bio-plastic | ✓ | Pea protein isolate directly acquired<br>Protein/plasticizer (1.5,1.6,1.7) [GLY, GLY+ nisin (0,2,4%)]<br>Mixing (two-blade counter-rotating batch mixer) under adiabatic conditions at 25°C, 50 rpm for 5 minutes. Injection molding (MiniJet Piston Injection Molding System II) under 50 MPa, pre-injection at 60°C, 100s and packing stage at 50 MPa and 130°C                                                                           | [105] |
| c  | Bio-plastic | ✓ | Pea protein isolate directly acquired<br>Blending of PPI/GLY ratios (80/20; 70/30; 60/40 and 50/50) using a two-blade counter-rotating batch mixer (25°C and 50 rpm for 60 minutes) to a dough-like blend & injection molding [MiniJet Piston Injection Molding System (ThermoHaake)] with pre injection cylinder at 50°C for 100s, 0.1 MPa, injection at 50°C, 0.1–50 MPa and <1s. Packing stage with 130°C, 50 MPa and 200s               | [58]  |
| d  | Bio-plastic | ✓ | Pea protein isolate (PPI) is directly acquired.<br>PPI/GLY (60:40) mixed in two-blade counter-rotating batch mixer with speeds (10, 30, 50, 70 or 90 rpm) and time (from 1 to 180 min depending on the system) at 25°C, generally 10 min is set for all RPMs, 1 and 65 min additionally for 30 rpm. The injection cylinder was 130°C. Mold at 50°C, residence time for 20s at 500 bar pressure, post-injection time at 200s and 200 bar Pr. | [68]  |
| e  | Bio-plastic | ✓ | Yellow pea concentrate (YPC), pea protein isolate (PPI), whey protein isolate (WPI) was directly acquired. WPI, YPI, YPC and YPI + WPI (1:1 v/v) at 4% (w/v) with de ionized water. Solution adjusted to pH 8.0, heated at 75 °C for 30 min at 30 rpm. GLY (50% w/w) added. Films dried at 25°C for 72hr and stored at 50–52% RH                                                                                                            | [100] |
| 5a | Bio-plastic | ✓ | Soy protein: plasticizers (GLY, water, natural rubber latex) [3:1] Compression molding on bench-top press (Carver Model 3850, Wabash, IN) at 120°C for 5 min followed by 10 min cooling and conditioned at 21.1°C, 65% RH for 24hr                                                                                                                                                                                                          | [13]  |
| b  | Edible film | ✓ | Defatted soy protein (DSP), Gelatin (G), Papaya puree (PP) procured directly<br>1. Control films [8g w/w to 100ml of water with 2g w/w starch], 2. PP/1%G, and 3. PP/2%G, 4. PP/3%G, 5. PP/4DSP, 6. PP/1G/4DSP, 7. PP/2G/4DSP, 8. PP/3G/4DSP. Films dried at 40°C, 23% RH for 18hr and stored at 25°C                                                                                                                                       | [37]  |
| c  | Bio-plastic | ✓ | Soy protein isolate (SPI)<br>1. [SPI (7g/100ml water) + GLY (3.5% w/v)], 2. [SPI (7g/80ml water) / CMC (0.5g in 20ml water)], 3. [0.15% w/v catechin to 1], 4. [0.15% w/v catechin to 2] Films dried and stored at 25°C, 50% RH for 24 h.                                                                                                                                                                                                   | [84]  |
| d  | Films       | ✓ | Soy protein isolate (SPI) is directly acquired. SPI and GLY (1:1) mixed in two-blade counter-rotating ThermoHaake mixer for 10 mins, 50 rpm at below 37°C and torque 5 Nm. Injection molding of dough like blend                                                                                                                                                                                                                            | [42]  |

|    |                        |   |  |                                                                                                                                                                                                                                                                                                                                                                                        |       |
|----|------------------------|---|--|----------------------------------------------------------------------------------------------------------------------------------------------------------------------------------------------------------------------------------------------------------------------------------------------------------------------------------------------------------------------------------------|-------|
|    |                        |   |  | in Thermohaake Minijet piston Injection molding system cylinder at 40°C and mold at 70°C injected for 20s at 500 bar using a post-injection pressure of 200bar for 300s. Strengthening treatment- mold Temp increase (70-130°C), dehydrothermal (4 & 24hr at 50°C), Ultrasound (5 & 45 min at 20kHz)                                                                                   |       |
| e  | Bio-plastic            | ✓ |  | Soy protein isolate (SPI)<br>Mixed SPI, GLY(1:1) & Zinc Oxide nanoparticles (0, 1, 2, 4, 5wt. %) for 30 minutes at 50 rpm under adiabatic conditions, beginning at 20°C. Dough-like blends to Injection molding [MiniJet Piston Molding System II cylinder] at 40°C, 600 bar for 20 s & mold temp 70°C, 90°C or 110°C for 20 s at 200 bar. Finally thermal treatment at 50°C for 24hr. | [85]  |
| f  | Bio-plastic            | ✓ |  | Soy protein isolate (SPI)<br>SPI, additive- Ligno Cellulosic fibers (0,0.1,1.0,5.0wt.%), GLY mixed in a two-blade counter-rotating mixer PolyLab QC at RT 30°C 50rpm for 10min under adiabatic conditions. Injection molding with cylinder temperature 40°C, mold temperature 70,90,110,130°C, injection pressure 500 bar for 20 s and holding pressure 200 bar for 300 s              | [69]  |
| g  | Bio-plastic            | ✓ |  | Soy protein isolate (SPI)<br>Blending of SPI, 45%wt. plasticizer-polyols (GLY, EG, DEG, TEG) at RT, 50rpm for 10mins and Injection molding at 120°C, 600-700 bar other parameters varied according to plasticizers                                                                                                                                                                     | [86]  |
| h  | Super-absorbent matric | ✓ |  | Soy protein isolate (SPI)<br>Mixed SPI/ GLY (1:1) in a 2-blade counter-rotating batch mixer at RT, 50rpm for 10mins. Injection molding [MiniJet Piston Injection Molding system] with cylinder temp of 40°C, injected at 500bar-20s, compression molded at 200 bars for 300s, mold temperature at 60,70,80,90 and 130°C                                                                | [87]  |
| 6a | Edible film            | ✓ |  | Peanut protein isolates (PPI) from defatted peanut flour using alkaline extraction and acid precipitation. PPI/GLY solution at pH 9. Casted, dried at 90°C for 16hr and stored at 65% RH. Properties of film modified by physical & chemical treatments                                                                                                                                | [74]  |
| b  | Peanut Package film    | ✓ |  | Groundnut rotein (GNP) from de oiled cake using alkali extraction & acid precipitation. Stock: chitosan [Chi (2%w/v)], Polyvinly Alcohol [(PVA) (5% w/v)]. Films [1. GNP3- GNP 3%, Chi 2%, PVA 5%; 2. GNP4- GNP 4%, Chi 2%, PVA 5%; 3. GNP5- GNP 5%, Chi 2%, PVA 5%] casted, dried at 65°C and stored at 23°C, 60% RH for 48hr                                                         | [88]  |
| c  | Peanut-DIY bio-plastic |   |  | Peanut Compound [Peanut hulls waste (17g), potato flour from skins (30g), whole milk (expired), GLY-5ml] cooked in a fan-assisted oven at 180°C for 13 mins.                                                                                                                                                                                                                           | [108] |
| d  | Edible films           | ✓ |  | Peanut protein isolates (PPI) by alkaline extraction and acid precipitation.                                                                                                                                                                                                                                                                                                           | [89]  |

|    |                           |   |                                                                                                                                                                                                                                                                                                                                                                            |       |
|----|---------------------------|---|----------------------------------------------------------------------------------------------------------------------------------------------------------------------------------------------------------------------------------------------------------------------------------------------------------------------------------------------------------------------------|-------|
|    |                           |   | Films [Pea starch: PPI (1-100:0%, 2-90:10%, 3-80:20%, 4-70:30%, 5-60:40%, 6-50:50%, 7-0,100%) +GLY (1.5g)]/100ml distilled water. Solution boiled for 30mins,degassed under vacuum (0.1MPa for 10mins), cooled at RT & dried at 25°C for 24hr                                                                                                                              |       |
| 7a | Pack-age film             | ✓ | Rapeseed protein (RP) powder from rapeseed meal. Film [RP(3g) +G(3g)+sorbitol(2g)+sucrose(0.5g)+1.5%polysorbate 20+Grapeseed extract (0.5,0.7,1.0,1.2,1.5%)]casted and dried at 25°C for 48hr                                                                                                                                                                              | [90]  |
| b  | Tray                      | ✓ | Rapeseed cake (RC) is directly acquired. Mixing of preheated RC+15% GLY & compressed to sheets at 100°C, 220bar pressure for 12mins with sic-cative Manganese (III) acetylacetonate of 0 and 0.1wt. %.10g of sample was Extruded using Haake Rhe-omex twin extruder at 100°C and screw speed 35rpm.                                                                        | [109] |
| c  | Edible films              | ✓ | Rapeseed oil directly acquired<br>Denatured whey Protein Isolate (8%) + GLY(50%) + Rapeseed oil (0,1,2,3%) homogenized at 13,500 rpm for 6mins.Casted,dried at 25°C, 50%RH for 24 hr and stored at 54%RH, 25°C                                                                                                                                                             | [91]  |
| d  | Edible films              | ✓ | Rapeseed protein (RP) from rapeseed oil residue and Gelidium corneum algae (GC, gelatin (RG) directly acquired.<br>1. RP 4% (w/v)+ sorbitol (1.5,2%)/ sucrose (0.5,1.0,1.5%) + emulsifier polysorbate 20 (0.5,1.0,1.5,2.0 wt.%). 2. RP (2, 3, 4, 5 wt.%), GC (0.7%), 3.RP(2 wt.%),GC(0.5,0.7,1.0,1.3,1.5 wt%) Solution casted and dried at 25°C for 48hr                   | [106] |
| e  | Rape-seed Composite films |   | Rapeseed protein isolates (RPI) prepared from pro-tein meal. Rapeseed protein hydrolysate (RPH) by using alkaline protease. Films of RPI, RPI-Chitosan (CH), RPH [3, 6, 9, 12% hydrolysis]-CH, 12%RPH:CH (2:8, 4:6, 5:5, 6:4 ratio) +GLY was given ultrasonic treatment for 10mins at 65W and dried at 25°C,55% RH                                                         | [92]  |
| f  | Bio-plas-tics             | ✓ | Rapeseed meal (RM), milled pelletized-RM (M-RM), milled and sieved pelletized-RM (MS-RM) were di-rectly acquired. protein:GLY60:40) mixed in two-blade counter-rotating rheometer at 25°C, 50rpm for 15mins. Injection molding at T(80,100,120°C), injec-tion pressure with 500bar for 20s, holding pressure of 200bar for 300s. T of injection chamber 60°C in all cases. | [75]  |
| g  | Edible films              | ✓ | Rapeseed protein isolate(RPI) from defatted rape-seed meal. Coarse solution (4% w/v) fromlyophilized RPI or SRPI [5,10,15% (w/w) of succinic anhydride added to RPI]. Films casted and dried at 25°C,50%RH for 48hrs                                                                                                                                                       | [110] |
| 8a | Bio-plastic               | ✓ | Wheat gluten directly acquired<br>Mixing of WG 50wt.% +glycerol 18wt.%+ wa-ter32wt.% + glyoxal 3wt.%+Xanthan gum 1.5wt.% at                                                                                                                                                                                                                                                | [70]  |

|   |              |                        |   |                                                                                                                                                                                                                                                                                                                                                                                                                                                                            |       |
|---|--------------|------------------------|---|----------------------------------------------------------------------------------------------------------------------------------------------------------------------------------------------------------------------------------------------------------------------------------------------------------------------------------------------------------------------------------------------------------------------------------------------------------------------------|-------|
|   |              |                        |   | pH9 introduced into Rheomex 302p screw extruder with spindle speed 30rpm, die-cutting, compression molded at 130°C, 9MPa for 10min & conditioned for 2 weeks at 53%RH                                                                                                                                                                                                                                                                                                      |       |
| b | Wheat gluten | Edible films           | ✓ | Wheat gluten (WG) directly acquired. Films with different soaking treatments. Control-WG (15g) +ethanol (72ml) + glycerol (6g), 1. Mineral oil (3.5g); 2. Sodium sulfite (0.2g); 3. 2g replaced by keratin in 15gWG; 4. Control soaked in 15% w/w lactic acid; 5. Control soaked in 1M Calcium Chloride; 6. Control soaked in buffer solution for 20s with pH 7.5. All dried at 32°C for 5hr                                                                               | [93]  |
| c |              | Edible films           | ✓ | Wheat gluten was directly acquired. Emulsified WG with lipid phase (a blend of acetic esters of mono and di-glycerides and beeswax). 1.WG (10g) +plasticizer(glycerol-2.5g) + ethanol and HCL (50g) with ultrasound treatment for 12mins, thermally treated at 70°C for 15mins and dried at 25°C for 20hr, 2.EWG films+ lipid phase+ emulsifier-glycerol monostearate melted at 70°C, dried at 25°C for 24hr and 40°C for 1.5hr in oven. Finally, both dried at 53%RH,25°C | [107] |
| d |              | Bio-plastics           | ✓ | Wheat gluten is directly acquired. Mixed WG+ glycerol(30wt.%) +fish scale wastes (0, 2.5 ,5, 7.5, 10 weight%) in two-roll mill at RT for 2mins and compressed at 130°C for 10mins with pressure 250kg/cm <sup>3</sup> in molds                                                                                                                                                                                                                                             | [104] |
| e |              | Bio-plastics           | ✓ | Wheat gluten (WG) is directly acquired. Mixed WG: glycerol (100:35) in 3-roller mixer at room temperature, cold-pressed at 15MPa for 5mins, thermo-molding at 65,85,105,125°C at 15MPa for 15mins and stored at 52% relative humidity                                                                                                                                                                                                                                      | [71]  |
| f |              | Bio-plastics           | ✓ | Wheat gluten is directly acquired. Mixed WG (10-wt.%) +glycerol (30 weight% of dry WG), shrimp shell powder (0,2.5,5.0,10wt.% of WG) / calcinated shrimp shell powder (2.5wt.%) in two roll mill at RT for 2minutes & compression molded at 130°C,10minutes, pr 250kg/cm <sup>3</sup>                                                                                                                                                                                      | [55]  |
| g |              | Coating                |   | Wheat gluten (WG) directly acquired WG-coating solution- WG 20g +50ml deionized water + reducing agent (Sodium sulfite 0.08g/100ml) +pH 4 on the surface of the treated and untreated paper using thin-layer chromatography applicator & stored at 25°C for a week                                                                                                                                                                                                         | [101] |
| h |              | Super-absorbent matrix | ✓ | Wheat gluten is directly acquired. 6 samples with WG, plasticizer-water and glycerol disaccharides -sucrose and trehalose. Mixing at 2-5rpm increased till 200rpm at 25°C for 5 then injection molding in Haake pneumatic piston with cylinder at 50°C & mold T-130°C, injection and holding pressure 500bar for the 20s and post-injection 200s followed by dehydrothermal treatment at 50°C for 24hr                                                                     | [111] |

|     |           |                     |   |                                                                                                                                                                                                                                                                                                                                                                      |       |
|-----|-----------|---------------------|---|----------------------------------------------------------------------------------------------------------------------------------------------------------------------------------------------------------------------------------------------------------------------------------------------------------------------------------------------------------------------|-------|
| i   |           | Bio-plastics        | ✓ | Wheat gluten directly acquired<br>Preheating mixture at 80°C for 2mins. Mixing of WG, Glycerol, Octanoic acid, and 1,4-butanediol, micro algal biomass (10,20,30 per hundred parts) and hot pressed in compression molding at 120°C,40 bar for 10mins                                                                                                                | [102] |
| 9a  |           | Edible film pouch   | ✓ | O <sub>2</sub> barrier bilayer film pouch for Olive oil condiments.<br>Corn zein and Soy protein isolate (SPI) were directly acquired. Homogenized corn zein layer (2g CZ & 0.6g PEG in 30ml ethanol) was poured to dried SPI film (5gSPI,1.25g glycerol & 1.25g sorbitol in 100ml water) dried at 80-85°C for 30mins                                                | [94]  |
| b   | Corn zein | Bio-films           | ✓ | Corn zein directly acquired.<br>Granular zein in 75% ethanol solution to a concentration of 20 % (w/v) +plasticizer [oleic acid or edible oils] (0.7%) + additional plasticizer- glycerol (0.3%), + emulsifier (0.05%). Solution heated at 60-65°C for 10min, maintained at 25°C for 48hr & stored at 58%RH                                                          | [95]  |
| c   |           | Edible bilayer film | ✓ | Double casting,<br>Zeinfilm: Corn zein+ aqueous ethanol+ plasticizer(glycerin+ PEG600) (135,795,3,33g/kg concentration respectively) heated at 60°C, stored at 25°C,50%RH for 24hr.Bilayer films- by coating dried zein films with medium-chain triglyceride (MCT)oil, sorghum wax(SW)/MCT oil or carnauba wax(CW) /MCT oil & conditioned for 2days at 50%RH at 25°C | [96]  |
| 10  | Amaranth  | Bio-films           | ✓ | Amaranth flour by alkaline wet milling<br>4%Amaranth+ plasticizer (glycerol30,35,40g/100g flour):                                                                                                                                                                                                                                                                    | [97]  |
| 11a |           | Films               | ✓ | Three sunflower protein Isolate from residual pellet SPI (5%w/v) + plasticizer (1.5% w/v glycerol), pH 11dried at 60°C for 5hr and stored at 20°C,58%RH                                                                                                                                                                                                              | [98]  |
| b   |           | Films               | ✓ | SFPI by alkaline extraction from oiled cake<br>Mixing of [SFPI 100 parts by weight, plasticizer (glycerol 10-70), Water 10-50], conditioned at 25°C for 12hr. Extrusion-single screw extruder (width-10cm, thickness 0.05 and 1mm, Tdie-85C-160°C, Tsupply tank-50°C, screw-seed 20-200 rpm, dia19mm, L/D-25, compression rate-1.8)                                  | [72]  |
| c   | Sunflower | Films               | ✓ | Isolated sunflower protein from sunflower oil by alkali.<br>Mixing of ISFP/ plasticizer-glycerol (2:1) + additives (1 to 6%) [aldehydes, plant tannins, fatty acids & fatty alcohols] Thermo molding at 155°C for 2min using a hydraulic press, cooled 5mins & stored at 25°C,60%RH                                                                                  | [76]  |
| d   |           | Bio-films           | ✓ | Isolate of protein (IFSP) from oil cake by alkali extraction.<br>ISFP(2g) in 20ml of water, pH adjusted to 12 with bases [lithium hydroxide (LiOH), sodium hydroxide (NaOH), potassium hydroxide (KOH), aqueous                                                                                                                                                      | [99]  |

|     |             |              |   |                                                                                                                                                                                                                                                                                                                                                                             |       |
|-----|-------------|--------------|---|-----------------------------------------------------------------------------------------------------------------------------------------------------------------------------------------------------------------------------------------------------------------------------------------------------------------------------------------------------------------------------|-------|
|     |             |              |   | ammonia (30%), and triethylamine (TEA)] + plasticizer [five plasticizers (Glycerol, 1,3-propanediol, D-sorbitol, triethylene glycol (TEG), tetra ethylene glycol (TEEG)] stirred at 19000rpm, 1 min & centrifuged 5000rpm, 5mins to remove air bubbles, dried at 25°C for 24hr                                                                                              |       |
| 12a |             | Bio-plastic  | ✓ | Rice protein isolate from rice husks. Mixed RPC+ plasticizer(glycerol) +additives [reducing agent-Sodium bisulphite 0.3 wt. %; cross-linking promoters-glyoxal 3.0 wt.% and L-cysteine 1 wt.% in two-blade mixer at 50rpm, 60 min starting at 25°C] & dough-like blend in Injection molding [Mini]jet Piston Injection Molding System (ThermoHaake) at 130°C 300sec, 95MPa, | [77]  |
| b   | Rice        | Bio-plastic  | ✓ | Mixed Rice protein + plasticizer (glycerol-33 & 43 wt.%) in Polyab torque-rheometer by two rollers at 50rpm, 15mins, compression molding at 100 bar pressure for 10 min at 90, 100, 120, 140, 160 & 180°C) & stored at 53%RH                                                                                                                                                | [78]  |
| c   |             | Bio-plastic  | ✓ | Rice bran is directly acquired. Mixing [55% RB and 45% total plasticizer (2:1 water/glycerin)] in 2 blade counter rotating batch mixer at 200 rpm, 80°C & injection molding at three T=100, 130, 150°C with cylinder temperature at 50°C, injection pressure at cavity 500 bar & injection time 15s                                                                         | [73]  |
| 13  | sorghum     | Films        | ✓ | Kafirin extracted from sorghum gluten with hot ethanol (wet milling) 25g kafirin+105.5ml of 95% ethanol+ plasticizer (6.08g glycerin & 5.48g of PEG). Stored at 25°C & 50% RH                                                                                                                                                                                               | [79]  |
| 14a |             | Bio-plastics | ✓ | Glandless cottonseed flour directly procured. Mixture of denatured cottonseed protein and GLY mixed using speed mixer and three roller mills followed by hot press molding at 20 MPa, 130°C for 5 minutes                                                                                                                                                                   | [112] |
| b   |             | Bio-plastics | ✓ | Glandless cottonseed flour and cross-linking agents-formaldehyde glyoxal, glutaraldehyde was directly acquired. GLY+ Dried denatured cross-linked protein in high-speed mixer for 5 minutes, ground in triple roller mill and conditioned for 24hr at RT & hot press molded at 130°C, 200MPa for 5 minutes                                                                  | [59]  |
| c   | Cotton-seed | Bio-plastics | ✓ | Cottonseed protein isolate (CPI) from the defatted seed of glandless cotton by base solubilization and acid precipitation Mixing Polycaprolactone + protein (Washed Cottonseed Meal, CPI, Soy PI) + plasticizer (cottonseed oil, coconut oil, PEG-400) at different ratios, heated to 160°C for 5-10 minutes and hot pressed in molds at 80°C, 10 min & 2.76 MPa.           | [43]  |

**Table S2:** Comparison of various properties of bioplastics (Data in connection with Table S1)

| S. No | OP<br>[cm <sup>3</sup> ·μ<br>m/(m <sup>2</sup> ·<br>day·KPa<br>a)]               | WVP<br>(g.mm/<br>.day. KPa)                                                                                       | Tensile strength<br>(MPa)                                                                                                   | Elongation at<br>break (%)                                                                                | Thermal                                                                                                            | Young's<br>modulus<br>(MPa)                                                                         | Solubility<br>(%)                                                       | Surface<br>hydro-<br>phobicity<br>(UA<br>mL/mg)              |
|-------|----------------------------------------------------------------------------------|-------------------------------------------------------------------------------------------------------------------|-----------------------------------------------------------------------------------------------------------------------------|-----------------------------------------------------------------------------------------------------------|--------------------------------------------------------------------------------------------------------------------|-----------------------------------------------------------------------------------------------------|-------------------------------------------------------------------------|--------------------------------------------------------------|
| 1     |                                                                                  | 0.010-<br>0.018                                                                                                   | 0.47-3.03                                                                                                                   | 16.12%                                                                                                    | SP: Tg-<br>50°C<br>SPI: Tg-<br>37°C                                                                                |                                                                                                     | 51.06-87.00                                                             |                                                              |
| 2     |                                                                                  | 11.37-<br>16.91                                                                                                   | 3.73-6.59                                                                                                                   | 8.83-37.70                                                                                                |                                                                                                                    |                                                                                                     | Protein:19.26-<br>27.00<br>Film:37.53-<br>39.43                         |                                                              |
| 3     |                                                                                  | 0.0035                                                                                                            | 4.24±1.26                                                                                                                   | 58.22                                                                                                     |                                                                                                                    |                                                                                                     | low at pH 7.5<br>and 9                                                  |                                                              |
| 4a    | Heat de-<br>nated<br>film at<br>ppc/gly<br>(70/30)-<br>0.170,<br>(50/50)-<br>309 | Heat denatured film<br>at ppc/gly (50/50)-0.69<br>± 0.07, (80/20)-<br>4.93±1.02, native<br>film (70/30)- 4.1±1.73 | Heat dena-<br>tured film at<br>ppc/gly<br>(80/20)-0.8±<br>0.2 (60/40)-<br>147±13.6<br>Native film<br>(50/50) -<br>95.3±20.3 |                                                                                                           |                                                                                                                    | Heat de-<br>nated<br>(70/30)-<br>204.86±66<br>.48 Na-<br>tive film-<br>(70/30)-<br>1015.2±18<br>7.4 | 32.2±9.8-<br>37.8±4.5                                                   |                                                              |
| 4b    |                                                                                  | No change on nisin<br>addition                                                                                    | Decreased<br>with increas-<br>ing nisin                                                                                     |                                                                                                           |                                                                                                                    | Increased<br>with in-<br>creasing<br>nisin                                                          |                                                                         |                                                              |
| 4c    |                                                                                  | High for 70/30 and<br>60/40 ratios                                                                                |                                                                                                                             |                                                                                                           | PPI: Tg-<br>100°C                                                                                                  |                                                                                                     | PPI:30                                                                  | Water<br>absorp-<br>tion ca-<br>pacity is<br>high<br>>100%   |
| 4d    |                                                                                  | Highest at 30 rpm (1<br>& 10min)                                                                                  | Have similar<br>values inde-<br>pendent of<br>the mixing<br>process                                                         |                                                                                                           |                                                                                                                    | Highest<br>at 30 rpm<br>(1& 10<br>min)                                                              |                                                                         | Water<br>uptake<br>capacity<br>is high<br>(hydro-<br>philic) |
| 4e    |                                                                                  | WPI -1.72 ± 0.61,<br>YPI+WPI-0.43 ± 0.22,<br>YPI-0.65 ± 0.29, YPC-<br>0.18 ± 0.092,                               | YPI-65.64 ±<br>29.35, WPI-<br>39.26 ± 13.88,<br>YPI+WPI-<br>35.57 ± 17.79,<br>YPC-9.69±4.84                                 | Tg-<br>YPI+<br>WPI<br>85.3±4.9<br>5°C<br>same<br>range<br>for WPI,<br>YPI and<br>YPC<br>(94.6-<br>95.8°C) | WPI-<br>66.63 ±<br>23.56,<br>YPI+<br>WPI-<br>28.64 ±<br>12.81,<br>YPI-6.65 ±<br>2.97,<br>YPC-<br>0.026 ±<br>0.013, | YPI-36.5± 5.22;<br>WPI,<br>YPI+WPI,<br>YPC in range<br>of 49.3-51.6<br>51.6±4.84                    | Surface<br>hydro-<br>philicity:<br>YPC <<br>YPI < YPI<br>+ WPI <<br>WPI |                                                              |

|           |                                                                                                                                                              |                                                                                 |                                                                             |                                                                                           |                                                                |                                                                                    |                                                                                          |
|-----------|--------------------------------------------------------------------------------------------------------------------------------------------------------------|---------------------------------------------------------------------------------|-----------------------------------------------------------------------------|-------------------------------------------------------------------------------------------|----------------------------------------------------------------|------------------------------------------------------------------------------------|------------------------------------------------------------------------------------------|
| <b>5a</b> | Poor with Soy-Gly 7.5 as max                                                                                                                                 |                                                                                 |                                                                             |                                                                                           | The endothermic peak of soy bioplastic-180-185°C               | Soy-gly 300, Soy-NRL 100                                                           |                                                                                          |
| <b>5b</b> | Highest in PP control films-8.71, lowest in PP/3G-7.52.                                                                                                      | Highest in PP control-8.45 and least in PP/3G/4 DSP -5.55                       | 4DSP/3G/PP-6.8, Highest in PP/3G-8.20                                       | Max of 28.11-PP/4DSP, min of 13.15-PP/3G                                                  | Tg of PP-90.19, PP/3G-87.75, PP/4DS P-91.22, PP/4DS P/3G-89.11 | PP-77.54, PP/3G-88.70, PP/4DSP-72.20, PP/4DSP/3G-82.26                             | Water contact angle: Highest-PP/3G/4 DSP-75°, Lowest-PP /4DSP 25.27 °, PPcontrol-29.34 ° |
| <b>5c</b> | SPI -1.09±0.03, SPI/CMC-1.08±0.07, SPI/CT-1.24±0.04, SPI/CMC/CT -1.10±0.05 (×10 <sup>-3</sup> cc·mm·m <sup>-2</sup> ·da y <sup>-1</sup> ·kPa <sup>-1</sup> ) | SPI -19.80±2.48, SPI/CMC -16.32±0.94, SPI/CT-15.93±1.29, SPI/CMC/CT -15.26±0.57 | SPI -4.09 ±5.3, SPI/CMC-5.68 ±0.39, SPI/CT-4.33±0.24, SPI/CMC/CT -5.56±0.28 | SPI -237.48 ±15.25, SPI/CMC-131.42± 9.64, SPI/CT-247.79± 26.20, SPI/CMC/CT -140.44± 16.65 |                                                                | SPI -27.37±0.73, SPI/CMC -30.54 ±0.49, SPI/CT-28.69 ±0.76, SPI/CMC/CT -29.34 ±0.40 |                                                                                          |
| <b>5d</b> |                                                                                                                                                              |                                                                                 | Max: DHT at 24 hr., DHT at 4hr,130°C                                        | Max: DHT at 4hr, 130°C, DHT at 24hr                                                       |                                                                | Max: DHT at 24 hr., DHT at 4hr, 130°C                                              | DHT decreases water uptake capacity                                                      |
| <b>5e</b> |                                                                                                                                                              |                                                                                 | Max at highest mold T, 1 and 2wt% ZnO and decreased at 4.5wt.%              | The effect is significant at all temperatures and 1wt.% is the highest                    |                                                                | Decreases with an increase of Temperature or ZnO content                           | Reduced water uptake capacity with increase in both temperature and ZnO %                |

|           |                                                                                                   |                                                                                                 |                                                                               |                                                                                                           |                                                                                                                                     |                                                                   |                                                                            |
|-----------|---------------------------------------------------------------------------------------------------|-------------------------------------------------------------------------------------------------|-------------------------------------------------------------------------------|-----------------------------------------------------------------------------------------------------------|-------------------------------------------------------------------------------------------------------------------------------------|-------------------------------------------------------------------|----------------------------------------------------------------------------|
| <b>5f</b> |                                                                                                   |                                                                                                 | Max at 5% LCF (160% increase) no differences observed upon 1wt.% LCF          | Max with 5%LCF (115%inc) but no change till 1%                                                            | Experienced 1.5 times higher with 5% LCF no changes until that                                                                      | No significant differences in soluble matter loss for all systems | Water uptake capacity decreased from 340 at 0.1 & 1% to 185 at 5% LCF      |
| <b>5g</b> |                                                                                                   |                                                                                                 | SPI/DEG > SPI/GLY > SPI/EG > SPI/TEG                                          | Max for SPI/GLY, SPI/DEG, SPI/EG-ductile, SPI/TEG-fragile behavior                                        | Tg for SPI/EG, SPI/GLY, SPI/DEG and SPI/TEG is <30,75, 80, 105°C respectively whereas it is - 5,20,60, 80°C after injection molding |                                                                   | Water uptake capacity is higher for SPI/TEG 621% and lower for SPI/EG-255% |
| <b>5h</b> |                                                                                                   |                                                                                                 | Highest at 90°C-1.52 (0% SB) and 0.99 (1%SB)                                  | Max at 130°C-1.06 (0% SB) and 0.99 (1%SB).                                                                | decomposition peak SB-150°C, SPI/GL-305°C, Gly-230°C                                                                                | Max at 90°C-15.3, min at 130°C-6.8                                | WUC-1700% with 0%SB, Max of 2250 and 2500% with 1% SB or SC                |
| <b>6a</b> | control-(22.52±0.43) Min with UV exposure at 24hr-(6.96±0.60) ×106 g cm/m <sup>2</sup> day mm Hg) | Control-(105.31±2.98), Min with heat curing at 70°C-50.32 ±1.09 (g cm/ m <sup>2</sup> day mmHg) | Control-0.557±0.08, Max with formaldehyde-1.85±0.2, glutaraldehyde (1.98±0.4) | Control-(140.73±26.63), Max with UV exposure for 24hr-160.34 ±39.79 and heat curing at 80°C - 98.26±32.25 | Control-(1.79±0.31), Max with glutaraldehyde (6.18±0.78), formaldehyde (5.76±0.56)                                                  | Control-(49.99±1.18), Succinic anhydride-(57.24±1.82)             |                                                                            |
| <b>6b</b> |                                                                                                   |                                                                                                 | Max at 3%GNP-(22.01), Min at 5%GNP-(16.07) LDPE:5.90                          | Max at 3%GNP-(89.82%), Min at 5%GNP-(64.73%) LDPE:291.66                                                  | Max at 5% GNP-(136.10), Min at 3% GNP-(111.50)                                                                                      |                                                                   |                                                                            |

|                 |                                                                              |                                                                             |                                                                                                 |                                                          |                                      |
|-----------------|------------------------------------------------------------------------------|-----------------------------------------------------------------------------|-------------------------------------------------------------------------------------------------|----------------------------------------------------------|--------------------------------------|
| LDPE:218<br>.33 |                                                                              |                                                                             |                                                                                                 |                                                          |                                      |
| 6c              | Weight loss%-mix 2-7.6, mix3-1.9, pean-mat-6.5                               |                                                                             |                                                                                                 |                                                          |                                      |
| 6d              | PS/PPI Min (60:40)-0.00017a and max (100:0)-0.00046                          | PPI (0 to 50%): pea starch reduced from 5.44 to 3.06.                       | PPI (0 to 50%): pea starch increased from 28.56 to 98.12%                                       | Max at 100 PS / 0 PPI-22.31, Min at 50PS/50PPI-9.78±0.12 |                                      |
| 7a              | Min at 0%GSE-0.023 Max at 1.5% GSE-0.033                                     | Max with 0% GSE - 31.87± 4.44, Min at 1.5% GSE-11.93± 0.9                   | Min at 0%GSE-13.37±3.40, Max at 1.5%GSE-72.74±5.5                                               |                                                          |                                      |
| 7b              | OTR More than 2000 [cm <sup>3</sup> m m/(m <sup>2</sup> -day-at m)]          | RC had the lowest stress and 5wt.% sic-cative became brittle                | RC lowest compared to CR and CA                                                                 | RC and CA have similar value half of CR                  |                                      |
| 7c              |                                                                              | 0%RO-4.9, 1%-4.3, 2%-5.9, 3%-6.3                                            | 0%RO-34.4, 1%- 43.7, 2%-45.9, 3%-73.1                                                           | 0%RO-23.6, 1%-16.9, 2%-20.1, 3%-31.5                     | 0% RO-42.4, 1%-40.9, 2%-40.7,3%-37.4 |
| 7d              | Max (3% RP /5%G)-0.031                                                       | Max (3%RP/ 3,4%G)-53.45 ±3.6, Min (6%RP/ 4%G) 0.50±0.66                     | Max (5% RP/ 0.7% GC)-54.45 ± 2.24% and (2%RP /0.5% GC)-52.61±6.01, Min (6%RP/4%G) 2.10±1.01     |                                                          |                                      |
| 7e              | Max for RPI, decrease gradually with CH and increase mildly with increase in | Min for RPI, gradually inc with inc in % hydrolysis, max at 12%RPH-CH (1:1) | RPI-CH had min value reached max with inc in % hydrolysis and 12%RPH-CH is greatest (1:1 ratio) |                                                          |                                      |

|    |                                                                                                            |                                                                                                |                                                                                                                           |                                                                                            |                                                                           |                                                                         |
|----|------------------------------------------------------------------------------------------------------------|------------------------------------------------------------------------------------------------|---------------------------------------------------------------------------------------------------------------------------|--------------------------------------------------------------------------------------------|---------------------------------------------------------------------------|-------------------------------------------------------------------------|
|    | % hydrolysis at 1:1 of RPI/CH                                                                              |                                                                                                |                                                                                                                           |                                                                                            |                                                                           |                                                                         |
| 7f |                                                                                                            | Increases with inc in mold T, more evident in M-RM, MS-RM                                      | Increases with in mold T, more evident in M-RM, MS-RM                                                                     |                                                                                            | Loss of soluble matter 52.7-54.3                                          | Highest of 186.7±1.6 for M-RM at 80°C                                   |
| 7g | RPI-0.032, 5%SRPI-0.013, 15% SRPI-0.041                                                                    | RPI-3.42, 5%SRPI-5.02, 15%SRPI-2.35                                                            | RPI-84.17, 5%SRPI-123.6, 15% SRPI-76.22                                                                                   | 5% SRPI have best thermal stability with Tm of 95.46, 24.33, 316.76°C at region I, II, III |                                                                           | 5% SRPI-108.68°, 10& 15% SRPI <65°, RPI-77.66°                          |
| 8a |                                                                                                            | Highest for extruded WG/GL/W at pH 9                                                           | Highest for extruded WG/GL/W at pH 9                                                                                      | Highest for WG/Gly/W, Lowest for WG/GL/GXAL-W                                              |                                                                           | Additives gave limited swellability, retaining a lower amount of water. |
| 8b |                                                                                                            | Control-(2.6 ± 0.2), 1(2.2±0.3), 2(2.9 ±0.4), 3(1.7± 0.22), 4(1.4±0.3), 5(3.8±0.9), 6(2.8±0.4) | Control-(237.9 ±21.9), 1(267.2 ± .01), 2(192.3 ± 24. 9), 3(313.5 ±3 4.5), 4(417.0± 41.5), 5 (162.2± 40.3), 6 (215.0±30.3) |                                                                                            |                                                                           |                                                                         |
| 8c | WG-air 15.8, support 17.3; EWG air, support-7.2 WVTR (10 <sup>-3</sup> g m <sup>-2</sup> s <sup>-1</sup> ) | Decrease as aw increase for both WG and EWG (lower)                                            | Increase as aw increases for both WG and EWG (higher)                                                                     | Tg of pure gluten-162°C. Tg less than 25°C at aw>0.43. Tg decreased as aw increased        | Decrease in value as aw increase from 0.1-0.9 in WG and EWG (lower) films | Contact angle- WG air-35.7, WG support-53.6, EWG air-64.3, support-65.2 |

|           |                                                                                                                                                     |                                                                                                                     |                                                                       |                                                                                            |                                                                                                                         |
|-----------|-----------------------------------------------------------------------------------------------------------------------------------------------------|---------------------------------------------------------------------------------------------------------------------|-----------------------------------------------------------------------|--------------------------------------------------------------------------------------------|-------------------------------------------------------------------------------------------------------------------------|
| <b>8d</b> |                                                                                                                                                     | WG-3.40, Max 7.51 at 2.5 wt.% FS and value dec on inc conc                                                          | WG-119%, WG+ FS -brittle                                              |                                                                                            |                                                                                                                         |
| <b>8e</b> |                                                                                                                                                     | Min at 25°C-0.52 and max at 125°C-6.69                                                                              | Min at 25°C-173.7 and max at 105°C-288.5 and decreases at 125°C-240.3 | Change in molding temperature had no Influence on Tg                                       | Min at 25°C-1.2 and max at 125°C-36.0                                                                                   |
| <b>8f</b> |                                                                                                                                                     | WG-3.40, SSP max at 2.5wt.% -6.53 and 10wt.% -3.78, CSSP-2.5wt.%- 16.50                                             | WG-118.99, SSP at 2.5wt.% -62.83 and at 10wt.% -42.89, CSSP-12.74     | Tmax of WG-322°C, 2.5%SSP -315°C, 2.5% CSSP-334°C                                          |                                                                                                                         |
| <b>8g</b> | Gas permeability WG/TP (O2-49689, CO2:59000), WG/UTP (O2-8328, CO2-16927) (10 <sup>-18</sup> mol m <sup>-1</sup> s <sup>-1</sup> Pa <sup>-1</sup> ) | TP-5.91, UTP-3.0, WG/TP-3.2, WG/UTP -1.27 (10 <sup>-11</sup> mol m <sup>-1</sup> s <sup>-1</sup> Pa <sup>-1</sup> ) |                                                                       |                                                                                            | Contact angle WG: TP-76.3°, WG: UTP-15.7°, water: TP-109.7°, water: UTP-43.3°                                           |
| <b>8h</b> |                                                                                                                                                     |                                                                                                                     |                                                                       | Reference system with water (25%), both sugar & water (<50%), with sugar & no water (>50%) | Water absorption highest for 20% trehalose with (no water-WGP/GLY)-750%, same composition with water-380%. water (>50%) |

|     |                                                                                                                     |                                                                                                        |                                                                             |                                                                                                             |                                                                                         |                                                                        |                                                                       |                                                                          |
|-----|---------------------------------------------------------------------------------------------------------------------|--------------------------------------------------------------------------------------------------------|-----------------------------------------------------------------------------|-------------------------------------------------------------------------------------------------------------|-----------------------------------------------------------------------------------------|------------------------------------------------------------------------|-----------------------------------------------------------------------|--------------------------------------------------------------------------|
| 8i  |                                                                                                                     | 20.1-20.3 WVTR (g h <sup>-1</sup> m <sup>-2</sup> )                                                    | 2.6-6.5 with glycerol and 3.3-4.9 with 1,4butanediol with increasing filler | 120 to 29.8 with glycerol and from 105.2 to 22.2 with 1,4 butanediol as a plasticizer and increasing filler |                                                                                         |                                                                        |                                                                       | 41 to 22° for glycerol, 32-29° for 1,4-butanediol with increasing filler |
| 9a  | SPI (0.6±0.03), CZ/SPI (0.81±0.05), ny/LLDPE (3.51±0.08) [*10 <sup>-18</sup> m <sup>3</sup> m /m <sup>2</sup> s Pa] | SPI (0.94±0.06), CZ/SPI (0.61±0.05), ny/LLDPE (<0.001) [* 10 <sup>-12</sup> kg m /m <sup>2</sup> s Pa] | SPI (2.5±0.5), CZ/SPI (5.9±0.4), ny/LLDPE (31.6±6.5)                        | SPI (178.6±19.7), CZ/SPI (7.3± 2.0), ny/LLDPE (179.2±25.9)                                                  | CZ/SPI is 50% soluble at 90°C                                                           |                                                                        |                                                                       |                                                                          |
| 9b  | Z+Oa(0.51±0.07), Z+B-(0.82±0.09), Z+M (0.76±0.05), Z+Oo(0.45±0.02)                                                  |                                                                                                        |                                                                             |                                                                                                             |                                                                                         | Z+Oa (5.04±1.58),Z+ B- (14.34±4.19), Z+M(14.34±4.19),Z+Oo (23.19±2.85) | Films with oleic acid were only hydrophobic. Others are hydrophilic   |                                                                          |
| 9c  | Control:0.377 , MCT oil-0.345, other wax/ oil coated-0.004                                                          |                                                                                                        | Control-1.05 ± 0.09, max: MCT oil 1.54± 0.05, Min: CW/MCT oil 0.82 ±0.02    | Control-130.2 ±6.9, max: wax/oil ratios of 167.9±9.1                                                        |                                                                                         |                                                                        |                                                                       |                                                                          |
| 10  | Film-5.63, Aamaranth flour-0.00065 × 1010 (cm <sup>3</sup> m <sup>-1</sup> s <sup>-1</sup> Pa <sup>-1</sup> )       | 0.387×10-3 Aamaranth flour-0.025 ×1010 (gm <sup>-1</sup> s <sup>-1</sup> Pa <sup>-1</sup> )            | 1.45 ± 0.04                                                                 | 83.74 ± 5.11                                                                                                | Tg- 76-85                                                                               | 215.0 ± 1.4                                                            | 42.25±1.82                                                            |                                                                          |
| 11a | SI (1.45±0.01), SIw(1.49±0.07)SIg(1.46±0.01) (g H <sub>2</sub> O Pa <sup>-1</sup> s <sup>-1</sup> m <sup>-1</sup> ) |                                                                                                        | All-4                                                                       | All-24                                                                                                      | Tg <sub>1</sub> (69°C) glycerol-rich phase & Tg <sub>2</sub> (-28°C) protein-rich phase | 0.58-all protein isolate films                                         | SI- 40%, SIw & SIg -more soluble in water and all in buffer solutions | SI (50±0.75), SIw (70.0±1.39), SIg(66.69 ±0.80)                          |

|            |                                                                                          |                                                                                                                           |                                                |                                                            |                                                                                                                                                |
|------------|------------------------------------------------------------------------------------------|---------------------------------------------------------------------------------------------------------------------------|------------------------------------------------|------------------------------------------------------------|------------------------------------------------------------------------------------------------------------------------------------------------|
| <b>11b</b> | 3.2                                                                                      | 73                                                                                                                        | 17.7                                           |                                                            | Swelling capacity-180%                                                                                                                         |
| <b>11C</b> | Control-2.8,<br>Max: (3% glyoxal -5.2,<br>6% tara tannin-4.4,<br>3% octanoic acid-7.     | Control-37.6%, 2% glyoxal slightly increase & 3.5% Glutaraldehyde dec by 40%, Chestnut tannin- 28%, 4% octanol inc by 2%, |                                                | All additives are insoluble in water due to plasticization | Water uptake capacity (%): control-32, 0.7% glutaraldehyde-15, 3.2% glyoxal-22 ; contact angle: control-17.9°, 3.3% HCHO-42°, 0.6% decanol-95° |
| <b>11d</b> | Max with LiOH, NaOH-3.9, least NH <sub>4</sub> OH-1.3, different plasticizers (1.8-27.1) | Maxi with NaOH base-251, least NH <sub>4</sub> OH-86, different plasticizers (1.6-251)                                    |                                                | 68% for 2mins, 89% for 10 mins and 92% for 12mins.         |                                                                                                                                                |
| <b>12a</b> | Max:RPC/Gly (70/30) Sodium Bisulfite, Min: RPC/Gly (70/30) glyoxal                       | Max: RPC/Gly (70/30) Cyst, Min RPC/Gly (70/30)                                                                            | RPC-96C, RPC-GL blends between 70-90C          | Max: RPC/Gly (70/30), Min RPC/Gly (70/30) GLX              |                                                                                                                                                |
| <b>12b</b> |                                                                                          |                                                                                                                           | Tg: 60-70C                                     |                                                            | Water absorption <50% and least with 33wt.% glycerol 20%.                                                                                      |
| <b>12c</b> | Max at 150°C-0.26, 130°C-0.18 and min at 100°C- 0.12,                                    | Max at 150°C-2.4, 130°C-1.6 and min at 100°C-1.1,                                                                         | Max at 150°C- 33 and 130°C-23; Min at 100°C-12 | Soluble matter loss from 32.2 to 27.3 for 100 to 150°C     | The water uptake capacity-254 to 137% for 100 to 150°C                                                                                         |
| <b>13</b>  | 5.5±0.2                                                                                  | 2.1±0.3                                                                                                                   | 106.1±9.7                                      |                                                            | Karabin has total hydrophobic amino acid of 58.3%                                                                                              |

|            |                                                                                                                             |                                                                                                                              |                                                                                                                                            |                                                                                                                                          |
|------------|-----------------------------------------------------------------------------------------------------------------------------|------------------------------------------------------------------------------------------------------------------------------|--------------------------------------------------------------------------------------------------------------------------------------------|------------------------------------------------------------------------------------------------------------------------------------------|
| <b>14a</b> | CP + glutaraldehyde had the highest micro hardness of 45MPa                                                                 |                                                                                                                              | Td of CP decreases from 156.2 °C to 136.0 °C when the glycerol increases from 10 to 30 wt.%, respectively                                  | CP-FA, CP-GX, and CP-GA absorbed less water than the standard sample (CP-0CL)                                                            |
| <b>14b</b> | CP-GA-45, CP-OCL-2                                                                                                          |                                                                                                                              | High thermal stability: CP-FA had least mass loss<190C, CP-GA >190C,                                                                       | water absorption (%) CP-0CL 40.90, CP-FA-37.23%, CP-GX-33.27, CP-GA-32.43                                                                |
| <b>14c</b> | C1- 0.48 (PCL-100, WCSM-0), X1-0.34(PCL-100, CSO-20), XC3-0.24 (PCL-80, CPI-20, CSO-20), XS3-0.17 (PCL-80, SPI-20, CSO-20), | MAX:C1-42(PCL-100, WCSM-0), X3-14 (PCL-80, WCSM-20, CSO-20), XC3-10 (PCL-80, CPI-20, CSO-20), xs3-17(PCL-80, SPI-20, CSO-20) | For PCL /WCSM / CO-degraded at 250-380C, X1(PCL/CO 100:20) de-graded at 350-420C, WCSM de-grades by itself and not interacting with PCL/CO | C5-13.1 (PCL-60, WCSM-40), X3-9.86 (PCL-80, WCSM-20, CSO-20), XC5-11 (PCL-60, CPI-20, CSO-20, CPI-40), XS5-6.34 (PCL-60, SPI-40, CSO-20) |
